# Supplementary material for: Integrating ConvNeXt Tiny and Radiomics in a Nomogram to Differentiate True Progression from Pseudoprogression in Glioma
Source: Research Square preprint supplement (doi:10.21203/rs.3.rs-8643558/v1), 2026-01-28
Supplement: Supplementary file 1 [file c517310904a03c8352afff2e.docx]

Supplementary materials

**Supplementary Methods S1.** Feature Extraction of Radiomics

The traditional radiomics features were extracted using the PyRadiomics 2.2.0 toolkit. The features included 8 first-order features, 18 two-dimensional shape features, 24 gray-level co-occurrence matrix (GLCM) features, 16 gray-level size zone matrix (GLSZM) features, 16 gray-level run length matrix (GLRLM) features, 5 neighboring gray tone difference matrix (NGTDM) features, and 14 gray-level dependence matrix (GLDM) features. We selected nine filters, including wavelet, Laplacian of Gaussian (LoG), square, square root, logarithm, exponential, gradient, and local binary pattern of two dimensions (LBP2D). The sigma values of the selected Gaussian Laplacian filter were 1 and 5. In total, 1589 radiomics features were extracted for each sequence. The intra-class and inter-class correlation coefficients (ICC) were calculated between the same radiologist at two time points and between the two radiologists. Features with an ICC greater than 0.75 were included in subsequent analyses.

**Supplementary Table S1. Summary of Multicenter MRI Scanning Sequence Parameters**

| Parameters | T2WI | T2-FLAIR | T1CE | DWI |
| --- | --- | --- | --- | --- |
| MR scanner A（Center A, Siemens MAGNETOM Avanto 1.5T） | | | | |
| TR (ms) | 4400 | 8000 | 2300 | 3500 |
| TE (ms) | 107 | 90 | 8 | 89 |
| Flip angle (°) | 120 | 150 | 120 | NA |
| Slice thickness (mm) | 5 | 5 | 5 | 5 |
| Slice gap (mm) | 1.5 | 1.5 | 1.5 | 1.5 |
| Matrix | 256×256 | 256×256 | 320×320 | 192×192 |
| FOV (mm2) | 230×230 | 230×230 | 230×230 | 230×230 |
| b-value (s/mm2) | NA | NA | NA | 1000 |
| MR scanner B（Center A, GE SIGNA Pioneer 3.0T） | | | | |
| TR (ms) | 4618 | 8000 | 3000 | 3739 |
| TE (ms) | 120 | 90 | 24 | 80 |
| Flip angle (°) | 111 | 160 | 111 | NA |
| Slice thickness (mm) | 5 | 5 | 5 | 5 |
| Slice gap (mm) | 1.5 | 1.5 | 1.5 | 1.5 |
| Matrix | 320×320 | 320×320 | 320×320 | 128×128 |
| FOV (mm2) | 240×240 | 240×240 | 240×240 | 240×240 |
| b-value (s/mm2) | NA | NA | NA | 1000 |
| MR scanner C（Center B, Philips Achieva 1.5T） | | | | |
| TR (ms) | 4000 | 8000 | 2800 | 4000 |
| TE (ms) | 120 | 100 | 20 | 80 |
| Flip angle (°) | 110 | 140 | 120 | NA |
| Slice thickness (mm) | 5 | 5 | 5 | 5 |
| Slice gap (mm) | 1.5 | 1.5 | 1.5 | 1.5 |
| Matrix | 320×320 | 384×320 | 320×320 | 192×192 |
| FOV (mm2) | 240×240 | 240×240 | 240×240 | 240×240 |
| b-value | NA | NA | NA | 1000 |

Note: T2WI= T2-weighted imaging; T2-FLAIR= T2-weighted fluid-attenuated inversion recovery; T1CE= T1-weighted imaging with contrast enhancement; DWI= diffusion-weighted imaging; MR= magnetic resonance; TR= repetition time; TE= echo time; FOV= field of view

**Supplementary Table S2. Summary of performance results for each model**

| Sets | Signature/Model | AUC (95% CI) | Acc, % | Sen, % | Spe, % | Pre, % | F1max |
| --- | --- | --- | --- | --- | --- | --- | --- |
| Training | DLRN | 0.907 (0.867-0.946) | 82.3 | 79.7 | 88.3 | 94.2 | 0.900 |
|  | Clinical | 0.688 (0.621-0.749) | 65.5 | 63.6 | 70.0 | 83.5 | 0.831 |
|  | T2-FLARI signature | 0.598 (0.532-0.665) | 58.1 | 57.3 | 60.0 | 77.4 | 0.831 |
|  | T1CE signature | 0.812 (0.759-0.862) | 69.0 | 57.3 | 96.7 | 97.6 | 0.849 |
|  | ADC signature | 0.805 (0.749-0.857) | 69.5 | 62.2 | 86.7 | 91.8 | 0.859 |
|  | Radiomics | 0.643 (0.576-0.709) | 70.9 | 80.4 | 48.3 | 78.8 | 0.827 |
|  | DL | 0.810 (0.754-0.862) | 77.8 | 80.4 | 71.7 | 87.1 | 0.878 |
|  | Rc | 0.588 (0.522-0.655) | 57.6 | 55.9 | 61.7 | 77.7 | 0.827 |
|  | Rd | 0.708 (0.645-0.768) | 70.4 | 69.9 | 71.7 | 85.5 | 0.827 |
|  | DLRN-assisted Rc | 0.776 (0.719-0.833) | 77.3 | 76.9 | 78.3 | 89.4 | 0.827 |
|  | DLRN-assisted Rd | 0.826 (0.773-0.877) | 80.3 | 76.9 | 88.3 | 94.0 | 0.846 |
| Test | DLRN | 0.873 (0.800-0.933) | 85.6 | 89.2 | 76.0 | 90.6 | 0.905 |
|  | Clinical | 0.630 (0.533-0.733) | 73.3 | 84.6 | 44.0 | 79.7 | 0.844 |
|  | T2-FLAIR signature | 0.562 (0.456-0.667) | 67.8 | 76.9 | 44.0 | 78.1 | 0.839 |
|  | T1CE signature | 0.714 (0.622-0.800) | 71.1 | 67.7 | 80.0 | 89.8 | 0.846 |
|  | ADC signature | 0.830 (0.744-0.900) | 67.8 | 58.5 | 92.0 | 95 | 0.881 |
|  | Radiomics | 0.617 (0.511-0.711) | 66.7 | 64.6 | 72.0 | 85.7 | 0.844 |
|  | DL | 0.814 (0.733-0.889) | 73.3 | 70.8 | 80.0 | 90.2 | 0.901 |
|  | Rc | 0.660 (0.556-0.756) | 63.3 | 60.0 | 72.0 | 84.8 | 0.839 |
|  | Rd | 0.686 (0.598-0.778) | 68.9 | 69.2 | 68.0 | 84.9 | 0.839 |
|  | DLRN-assisted Rc | 0.775 (0.689-0.856) | 80.0 | 83.1 | 72.0 | 88.5 | 0.857 |
|  | DLRN-assisted Rd | 0.825 (0.744-0.900) | 80.0 | 76.9 | 88.0 | 94.3 | 0.847 |

Note: DLRN=deep learning radiomics nomogram; T1CE=T1-weighted contrast-enhanced imaging; ADC=apparent diffusion coefficient; DL=deep learning; Rc=radiologist c; Rd=radiologist d; AUC=area under the curve; CI=confidence interval; Acc=accuracy; Sen=sensitivity; Spe=specificity; Pre=precision

**Supplementary Table S3. Variables and coefficients of the clinical model**

| Variables | Univariate OR (95% CI) | *Pa* | Adjusted OR (95% CI) | *Pb* |
| --- | --- | --- | --- | --- |
| Intercept | - |  | 0.639(0.121, 3.379) | 0.598 |
| Age (per 1-year increase) | 1.018 (1.012, 1.024) | <0.001 | 1.035(1.002, 1.068) | 0.035 |
| Grade |  |  |  |  |
| II | Ref. |  | Ref. |  |
| III | 0.825 (0.333, 2.045) | 0.678 | 0.574 (0.215, 1.527) | 0.266 |
| IV | 1.986 (1.074, 4.260) | 0.038 | 1.431 (0.628, 3.261) | 0.394 |
| IDH (wild-type vs. mutante) | 1.658(1.108, 2.480) | 0.014 | 0.484(0.255, 0.922) | 0.027 |
| MGMT (unmethylated vs. methylated) | 1.545(1.030, 2.395) | 0.049 | 0.439(0.231, 0.835) | 0.012 |

Note: IDH=isocitrate dehydrogenase; MGMT=O⁶-methylguanine-DNA methyltransferase; OR=odds ratio; *Pa*:=*P* values from univariate logistic regression analysis; *Pb=P* values from multivariable logistic regression analysis (model adjusted for all variables listed in the table)

**Supplementary Table S4. The numbers of features remained after each selection step**

| Step | T2WI | T2-FLAIR | T1CE | ADC |
| --- | --- | --- | --- | --- |
| Before selection | 2357 | 2357 | 2357 | 2357 |
| ICC | 1133 | 785 | 914 | 1833 |
| SPCC | 923 | 712 | 317 | 680 |
| LASSO | 0 | 3 | 12 | 16 |

Note: ICC=intraclass correlation coefficient; SPCC=Spearman rank correlation coefficient; LASSO=least absolute shrinkage and selection operator

**Supplementary Table S5. Cross-validation accuracy of different classifiers**

| Classifiers | T2-FLAIR | T1CE | ADC |
| --- | --- | --- | --- |
| XGboost | 62.7% | 75.1% | 67.9% |
| RF | 58.0% | 73.1% | 76.9% |
| SVM | 61.2% | 75.3% | 77.2% |

Note: XGboost=eXtreme Gradient Boosting; RF=random forest; SVM=support vector machine

**Supplementary Table S6. Comparison of NRI between the DLRN model and other models across different datasets**

| Comparison models | Data set | NRI (95% CI) | *P* |
| --- | --- | --- | --- |
| DLRN vs. Clinical | Training | 1.228 (0.978-1.442) | <0.001 |
|  | Test | 1.218 (0.836-1.538) | <0.001 |
| DLRN vs. T1CE signature | Training | 1.088 (0.820-1.327) | <0.001 |
|  | Test | 1.028 (0.628-1.387) | <0.001 |
| DLRN vs. ADC signature | Training | 1.047 (0.787-1.320) | <0.001 |
|  | Test | 0.665 (0.180-1.077) | 0.005 |
| DLRN vs. Radiomics | Training | 1.219 (0.993-1.442) | <0.001 |
|  | Test | 1.169 (0.763-1.551) | <0.001 |
| DLRN vs. DL | Training | 0.567 (0.247-0.862) | <0.001 |
|  | Test | 0.166 (-0.262-0.654) | 0.507 |
| DLRN vs. Rc | Training | 1.289 (1.049-1.517) | <0.001 |
|  | Test | 0.997 (0.578-1.378) | <0.001 |
| DLRN vs. Rd | Training | 1.058 (0.802-1.294) | <0.001 |
|  | Test | 0.806 (0.380-1.227) | <0.001 |

Note: DLRN: NRI= net reclassification index; DLRN=deep learning radiomics nomogram; T1CE=T1-weighted contrast-enhanced imaging; ADC=apparent diffusion coefficient; Rc=radiologist C; Rd=radiologist D

**Supplementary Table S7. NRI Provided by the AI-Assisted DLRN to Individual Radiologists**

|  | Training set | *P* | Test set | *P* |
| --- | --- | --- | --- | --- |
| Rc vs. DLRN assisted Rc |  |  |  |  |
| NRI (95% CI) | 1.299 (1.103-1.467) | <0.001 | 1.102 (0.685-1.490) | 0.002 |
| Rd vs. DLRN assisted Rd |  |  |  |  |
| NRI (95% CI) | 1.305 (1.094-1.506) | <0.001 | 1.298 (0.943-1.625) | <0.001 |

Note: NRI=net reclassification improvement; Rc=radiologist C; Rd=radiologist D


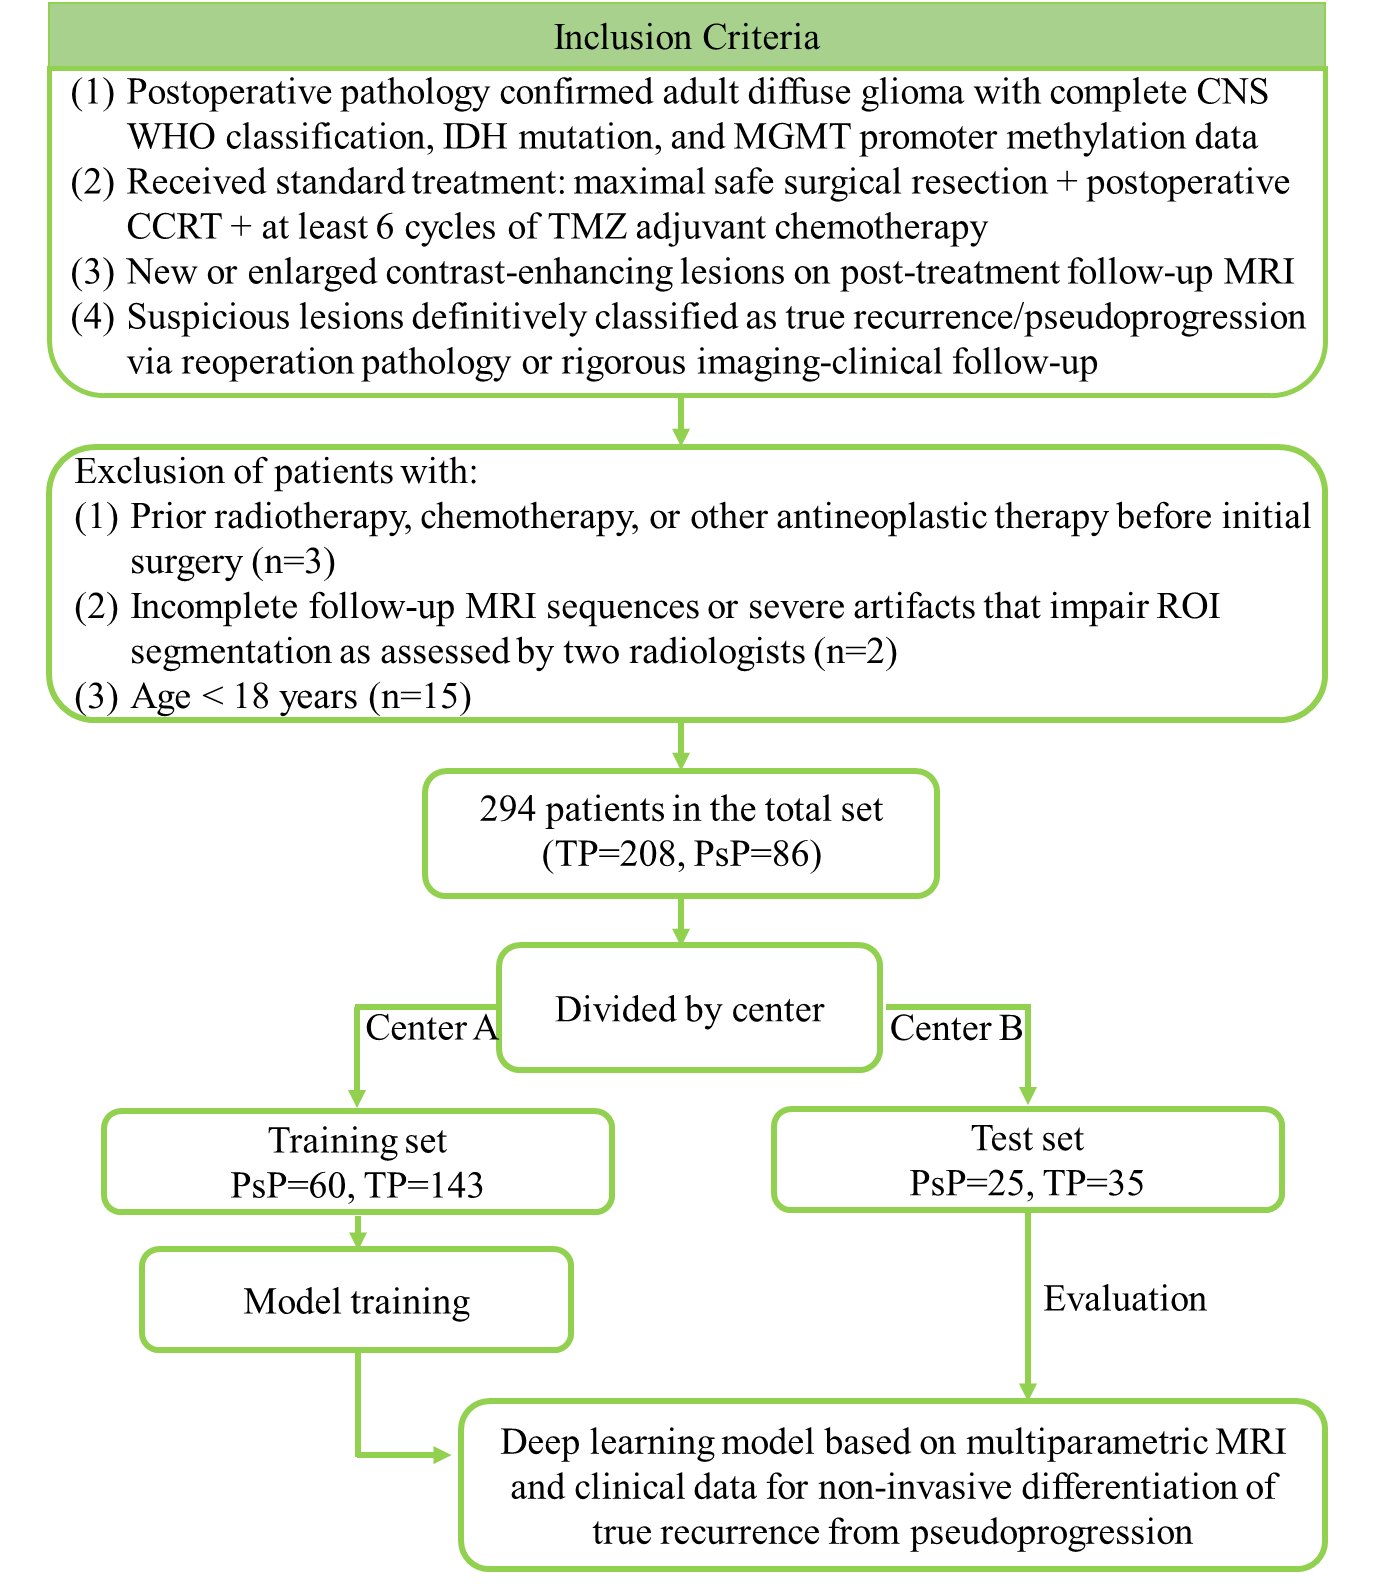


**Supplementary Figure S1. The inclusion and exclusion flowchart of this study**


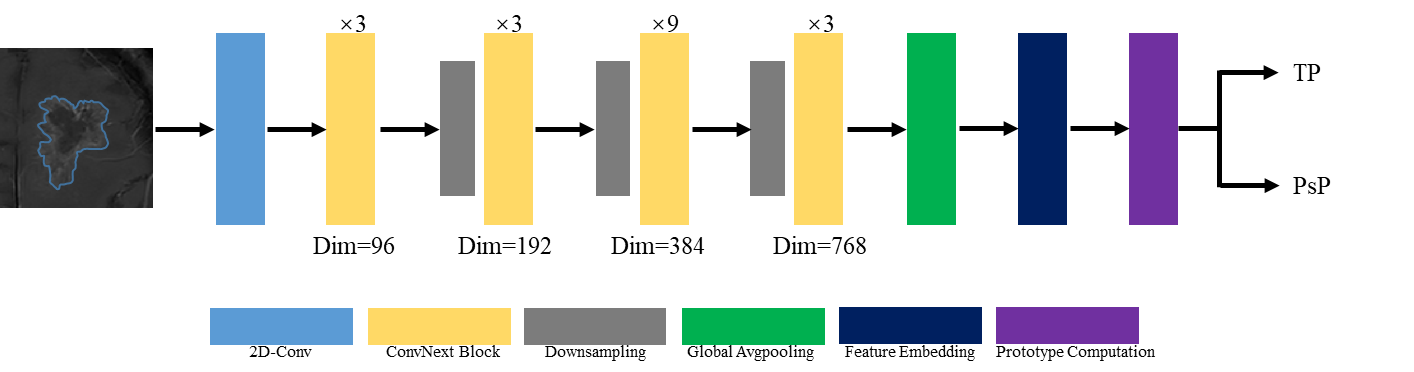


**Supplementary Figure S2. The customized ConvNeXt-Tiny architecture for classification of 2D MR images.** This architecture takes 224×224 pixel images as input, performs hierarchical feature extraction through 2D convolutional layers, ConvNeXt blocks (with dimensions progressively increasing from 96 to 768), and downsampling layers, and utilizes global average pooling to obtain feature embeddings. Finally, the prototypical network completes classification by computing the Euclidean distance between query embeddings and class prototypes.
